# Supplementary material
Source: PubMed Central journal article supplement (PMC3408171)

Supplementary Figure 1

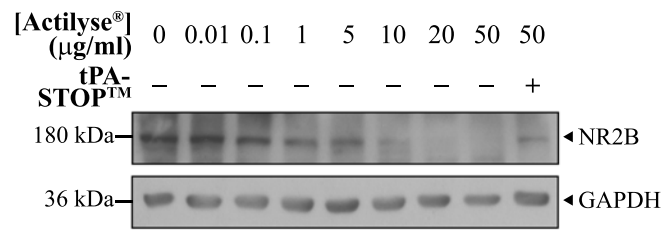

Supplementary Figure 2

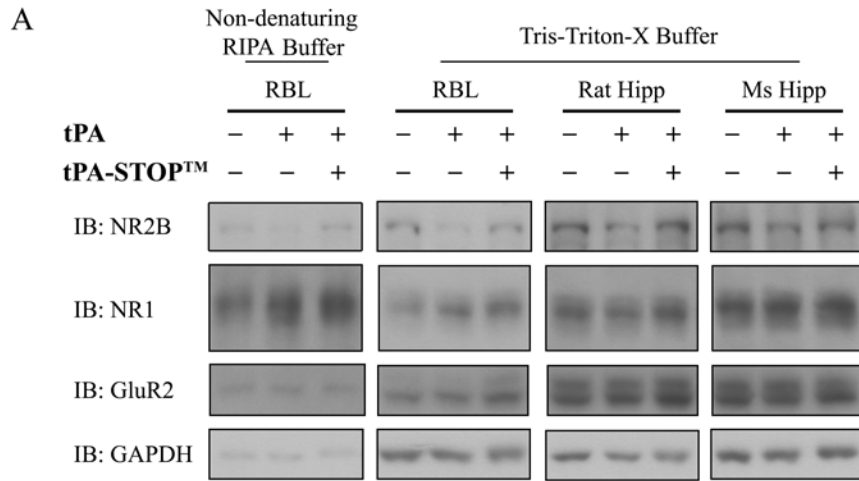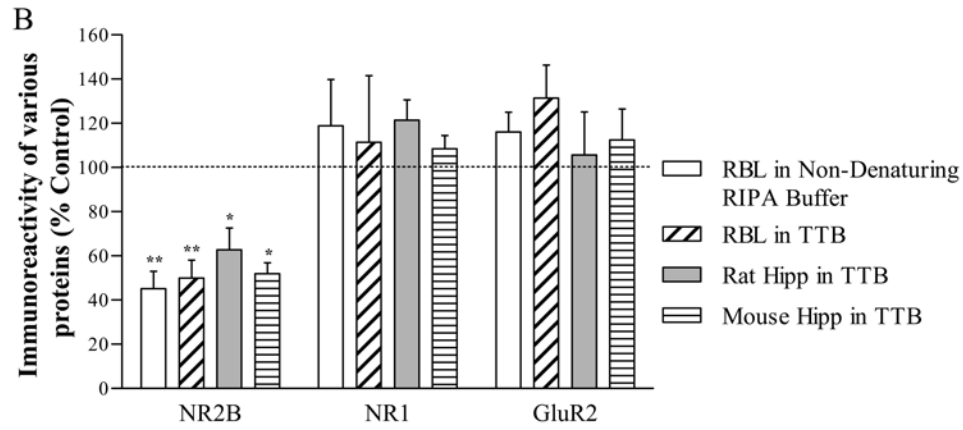

Supplementary Figure 3

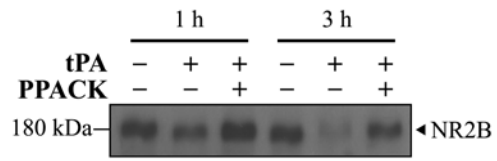

Supplementary Figure 4

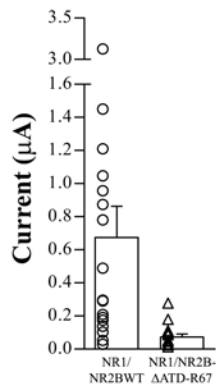

Supplement: supp_M112.374397_jbc.M112.374397-1.pdf [file supp_M112.374397_jbc.M112.374397-1.pdf]
